# Supplementary figures and images for: CD1d acts as a ligand of PIRA2 to promote macrophage activation in nonalcoholic fatty liver disease
Source: Research Square preprint supplement (doi:10.21203/rs.3.rs-8110440/v1), 2025-12-04

**Supplementary Figures**

**
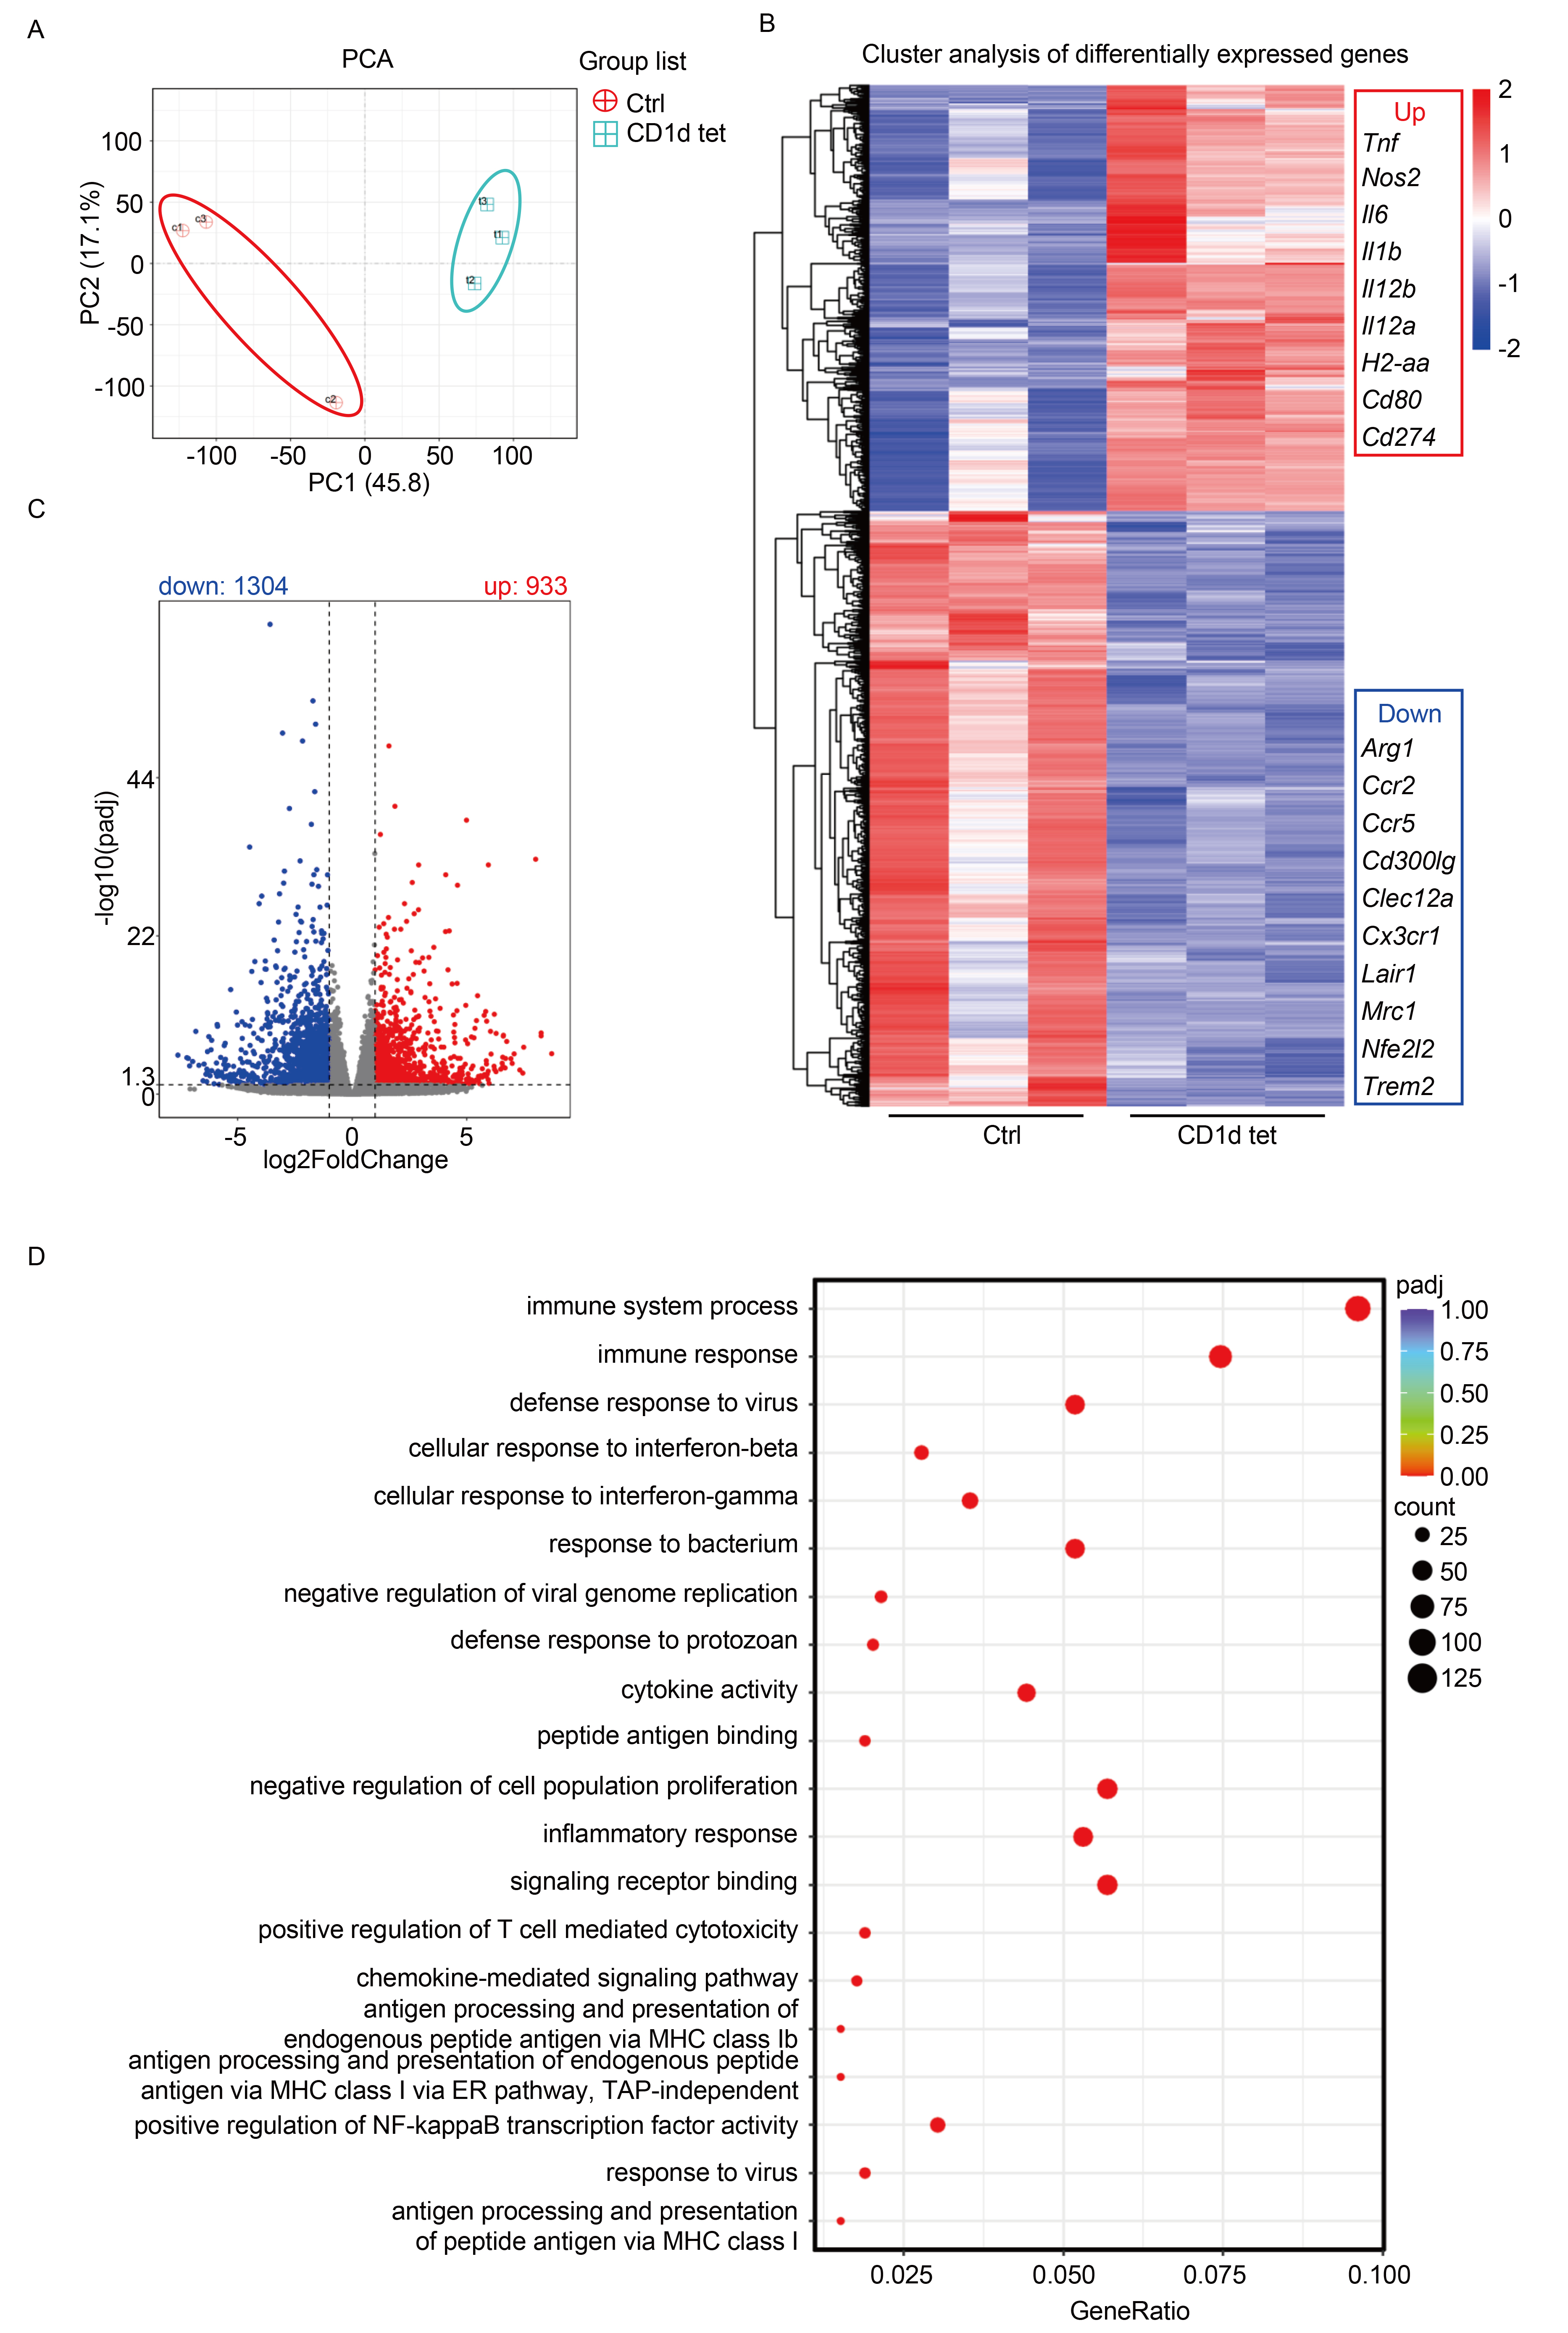
Figure S1**


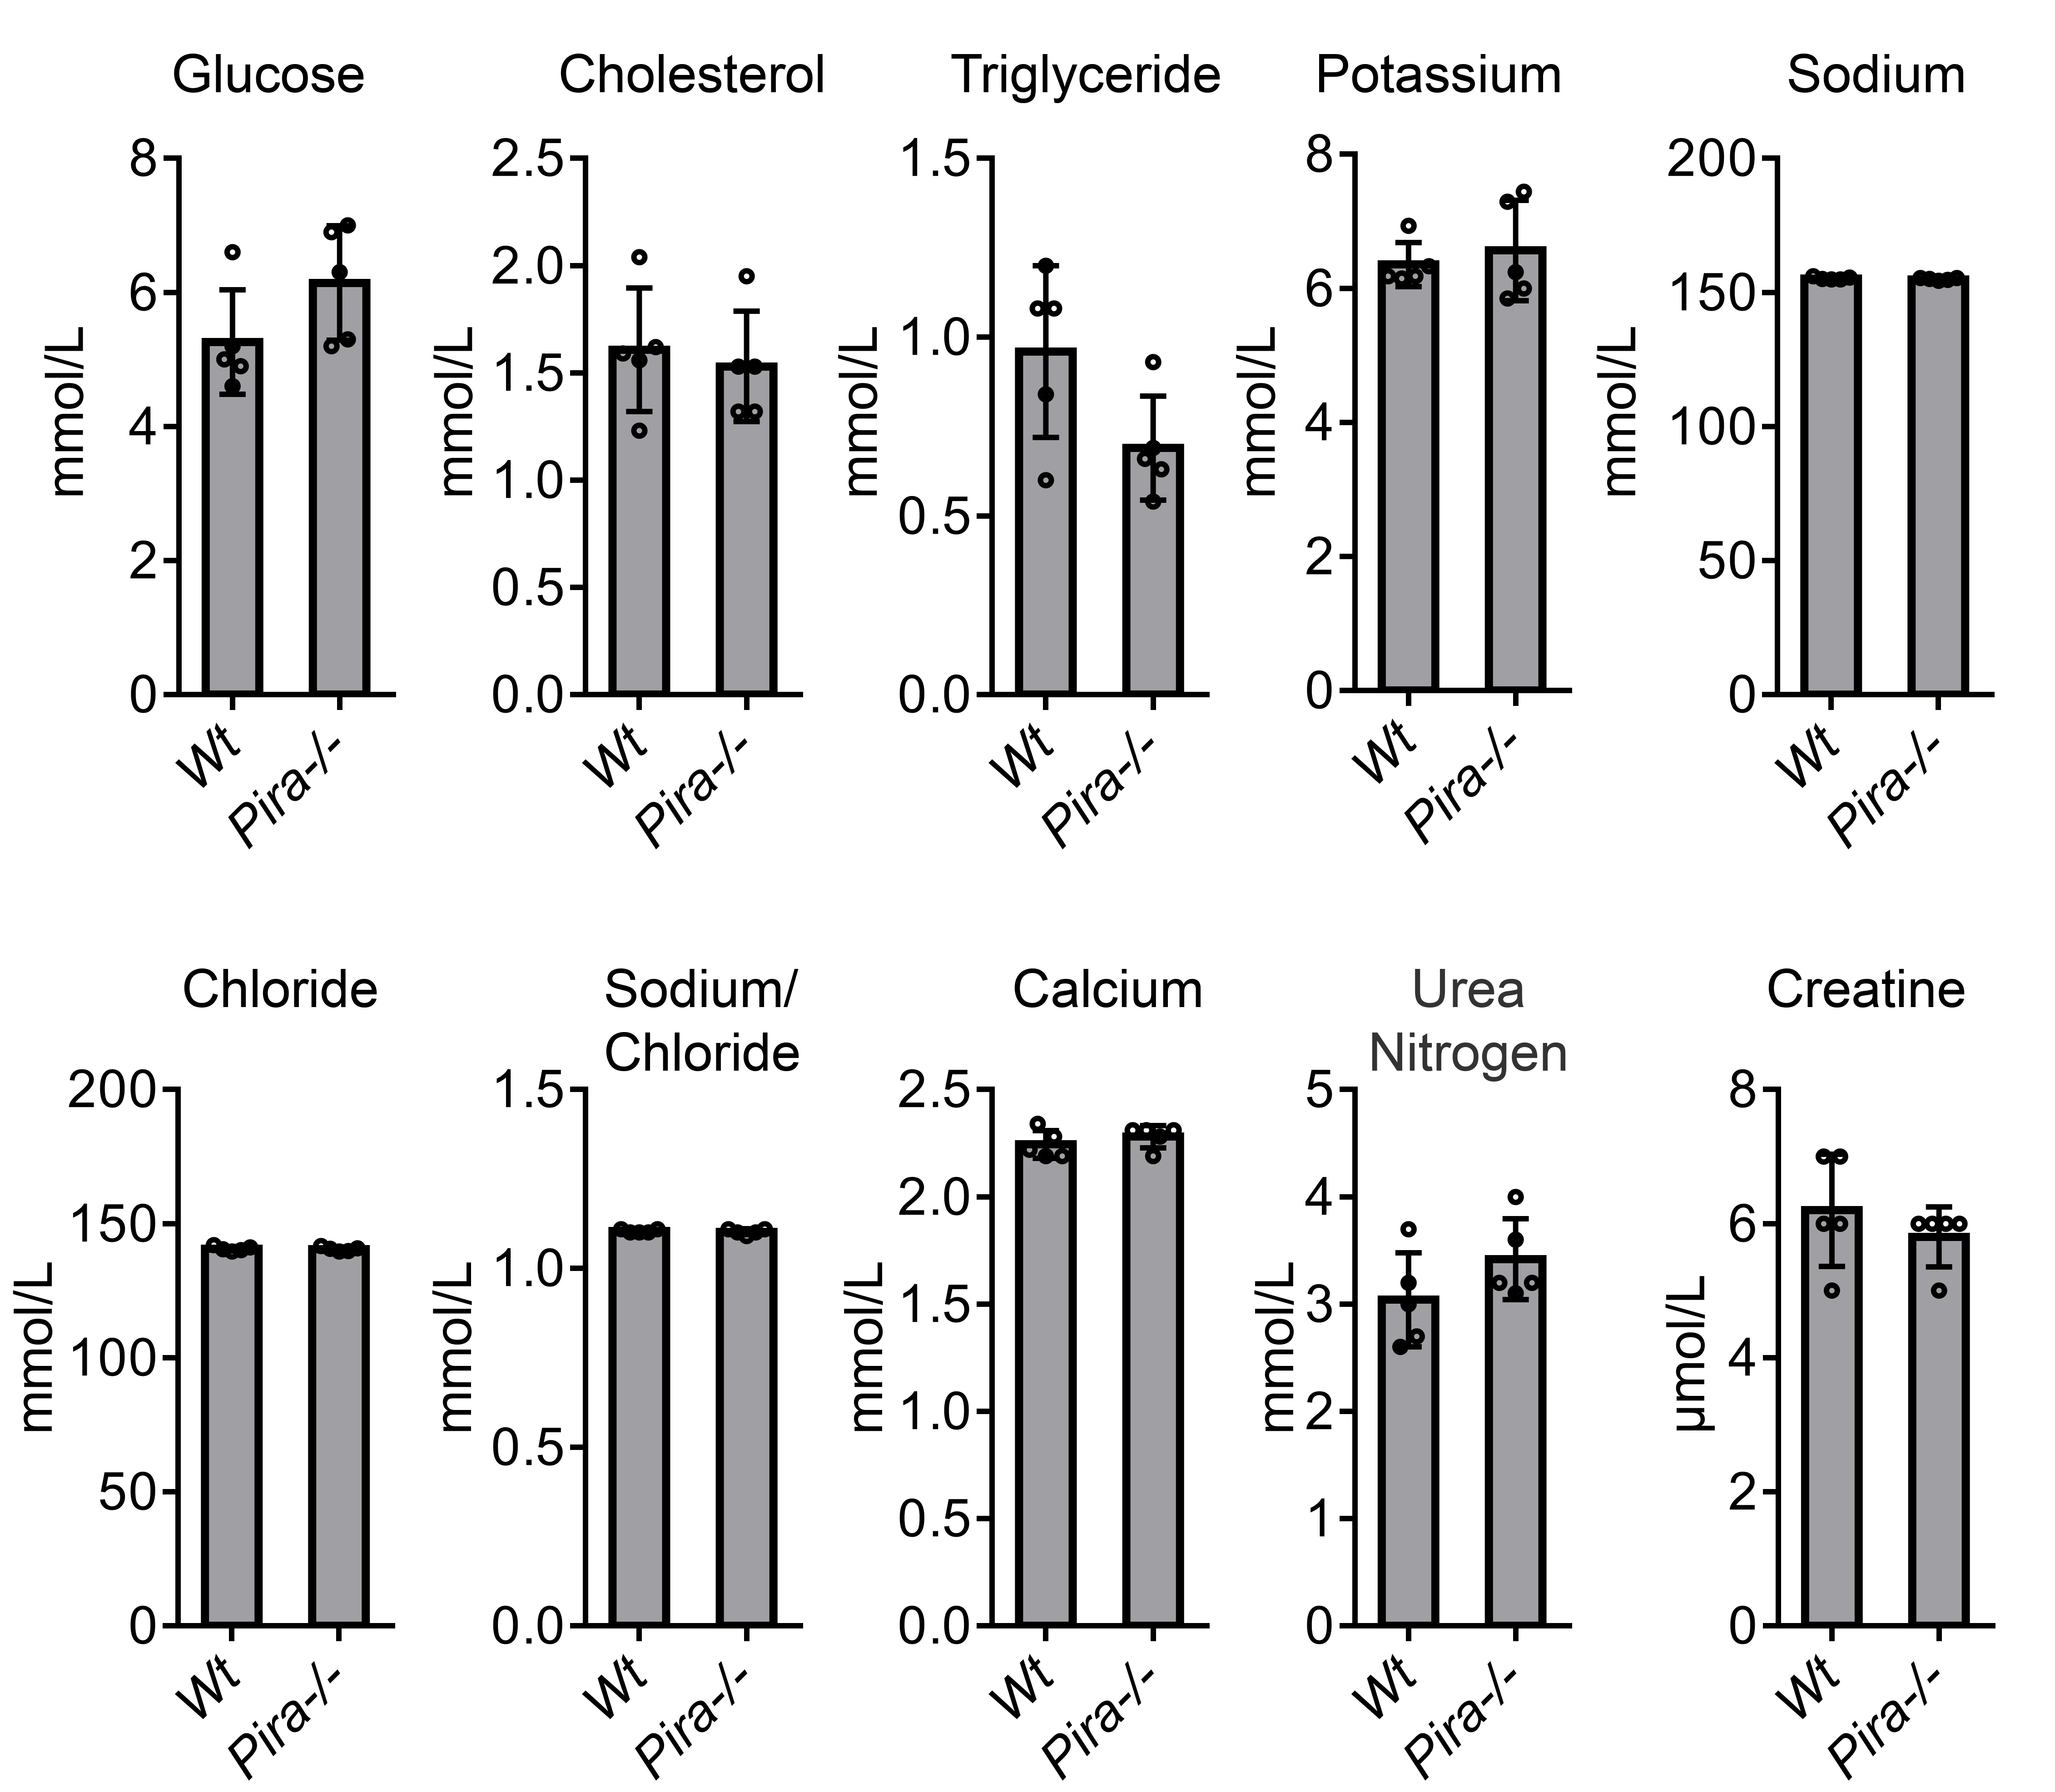
**Figure S2**

Supplement: Supplementary file 1 [file b78bf841647be834889f2b77.docx]
